# Supplementary material
Source: publisher figshare collection journal article supplement (https://frontiersin.figshare.com/ndownloader/files/12389891)

**Fig. S2** Fragments of BM1122 identified by LC-MS/MS.

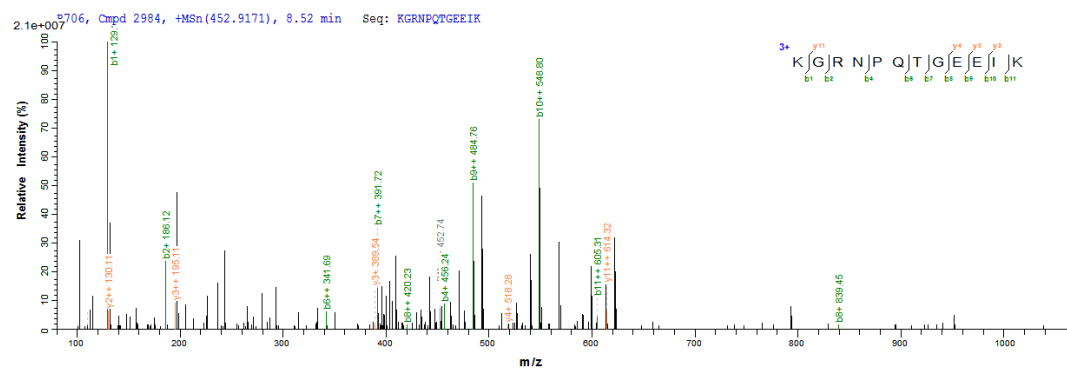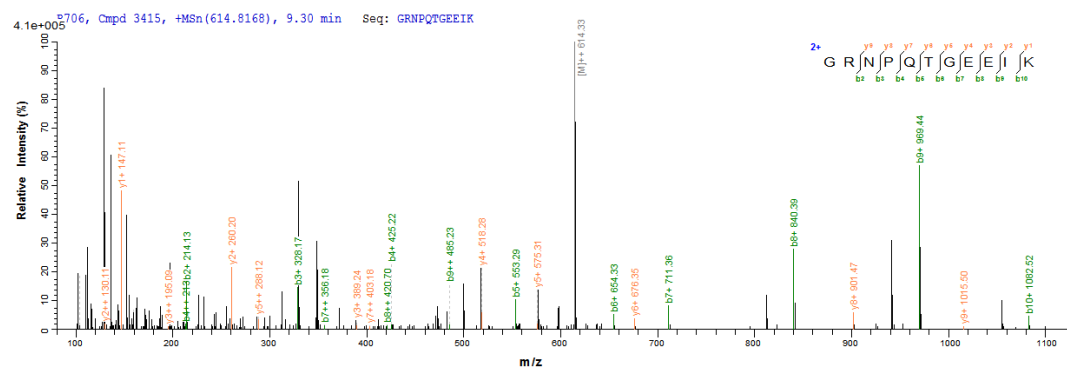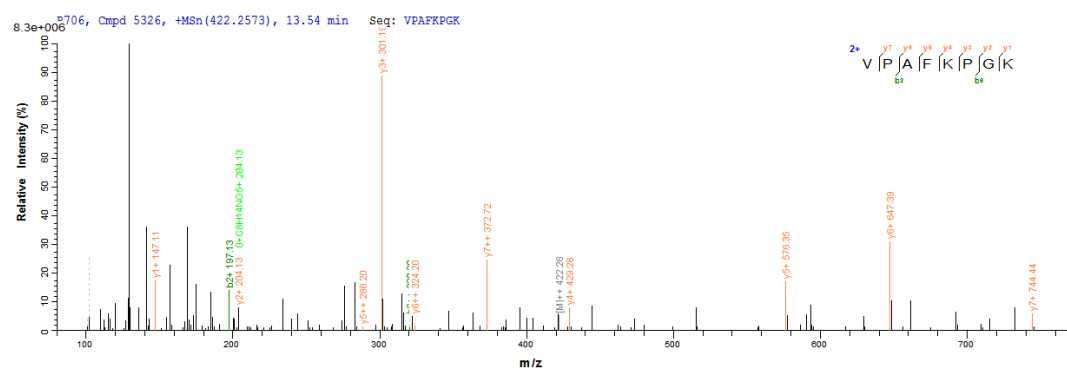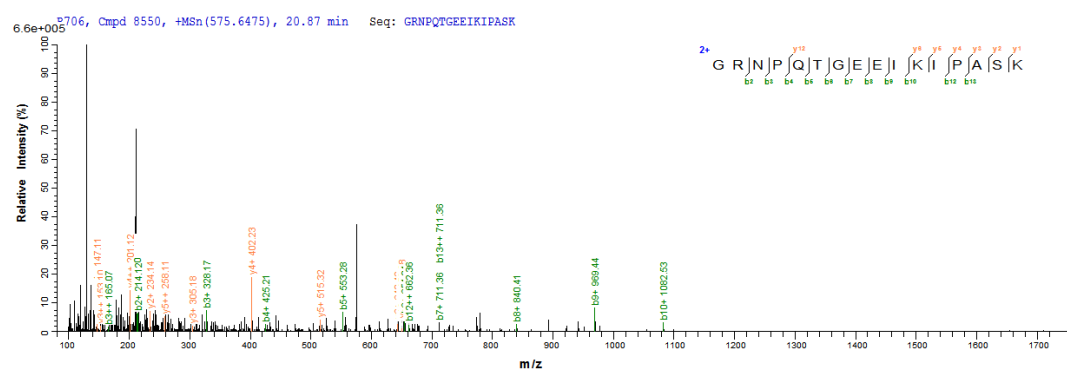

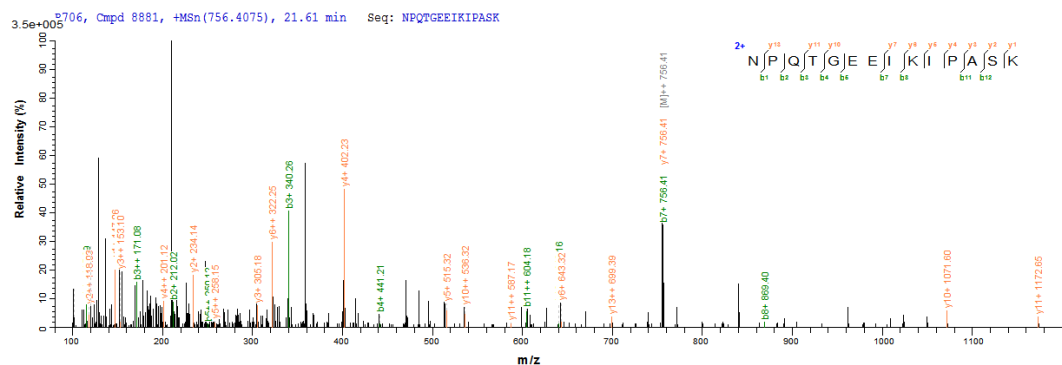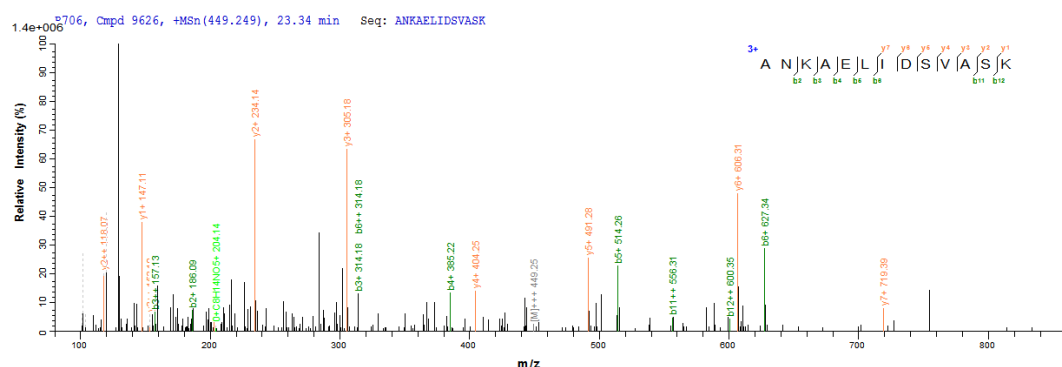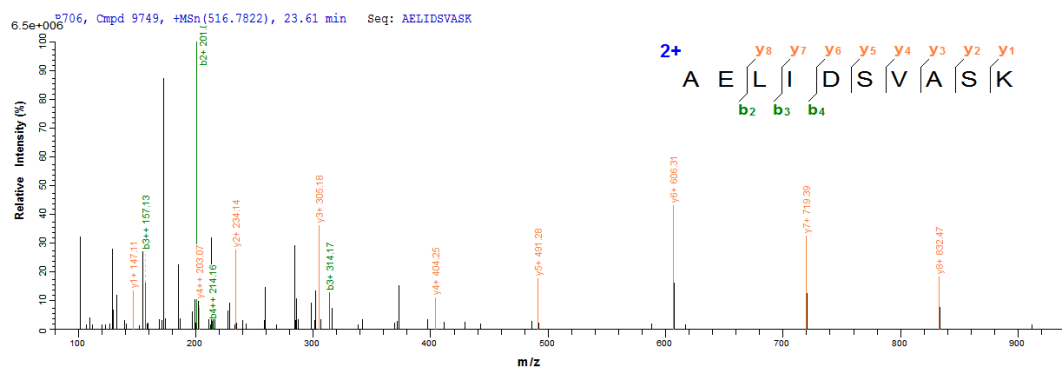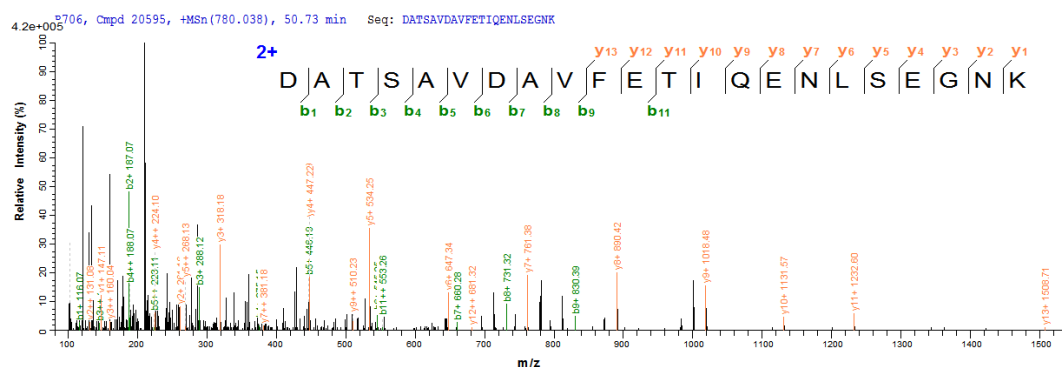

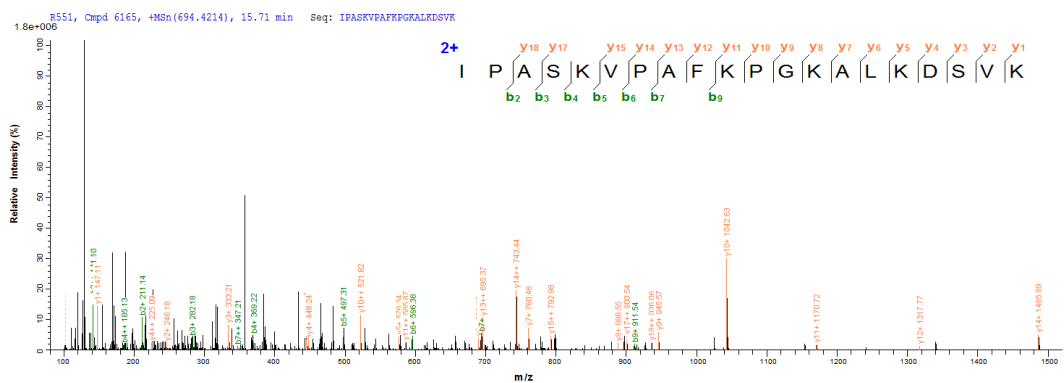

Supplement: Supplementary file [file 12389891]
